# Supplementary material for: The Thioredoxin System in Edwardsiella piscicida Contributes to Oxidative Stress Tolerance, Motility, and Virulence
Source: MDPI journal article supplement (doi:10.3390/microorganisms11040827), 2023-03-24
Supplement: s1 [file s1]

# Supplementary Materials: The Trx system in *Edwardsiella piscicida* contributes to oxidative stress tolerance, motility, and virulence

Jiaojiao He, Su Liu, Qingjian Fang, Hanjie Gu, Yonghua Hu

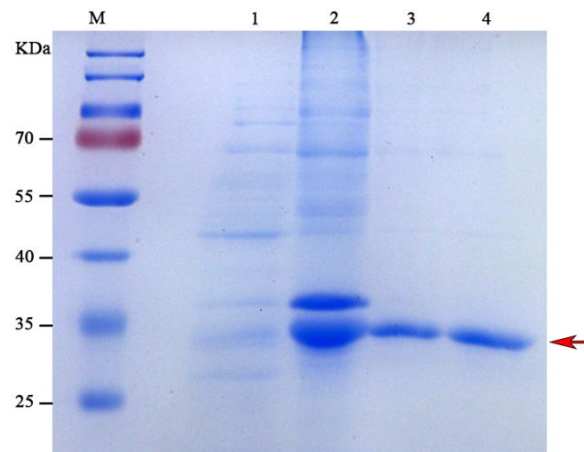

**Figure S1.** Expression and purification of rTrxB<sub>Ep</sub>. The rTrxB<sub>Ep</sub> carrying His-Tag is highly purified by affinity chromatography with Ni-NTA. The band indicated by the red arrow is rTrxB<sub>Ep</sub> protein, which mainly appears in the SDS-PAGE gel stained with Coomassie blue. Lane M: PageRuler Prestained Protein Ladder (Thermo Scientific, US); lane 1: non-induced sample; lane 2: IPTG-induced sample; lane 3: purified sample; lane 4: renatured sample.

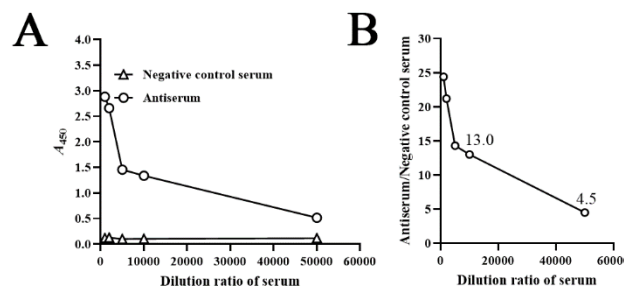

**Figure S2.** Determination of antiserum titer by ELISA. **A**, the antibody reacted with purified rTrxB<sub>Ep</sub> protein by continuous dilution (from 1000-fold, 2000-fold, 5000-fold, 10000-fold to 50000-fold). The unimmunized mice serum was used as a negative control. **B**, the ratio of absorbance between anti-rTrxB<sub>Ep</sub> serum and negative control serum. When the dilution ratio was 1:50000, the absorbance ratio of anti-rTrxB<sub>Ep</sub> serum to negative control serum was 4.5.

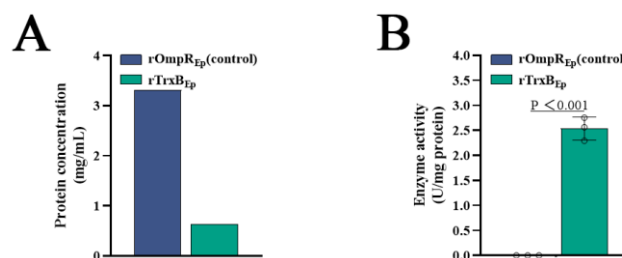

**Figure S3.** The thioredoxin reductase activity of the rTrxB<sub>Ep</sub>. **A**, the content of rOmpR<sub>Ep</sub> (control) and rTrxB<sub>Ep</sub> was measured using the BCA Protein Assay. **B**, based on OD<sub>412</sub> analysis the activity of thioredoxin reductase compared with the control rOmpR<sub>Ep</sub>.

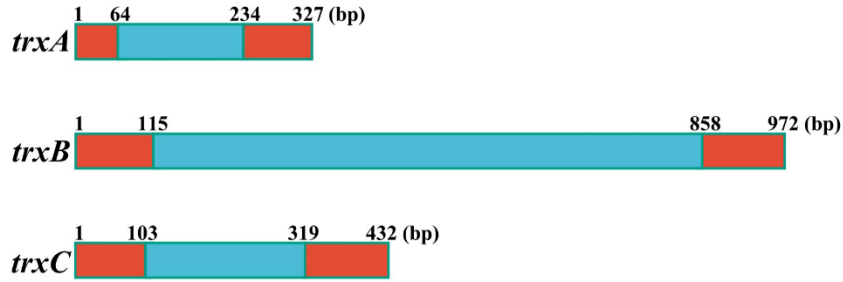

**Figure. S4.** The sequences knockout location map of *trxA*, *trxB*, *trxC*. Retained sequences are indicated by red shapes and knocked-out regions are indicated by blue shapes.

**Table S1** Strains, plasmids used in this study

| Strains or plasmids           | References or sources                    |
|-------------------------------|------------------------------------------|
| <i>Edwardsiella piscicida</i> |                                          |
| TX01                          | Isolated from diseased Japanese flounder |
| $\Delta trxB$                 | This study                               |
| $\Delta trxA$                 | This study                               |
| $\Delta trxC$                 | This study                               |
| <i>Escherichia coli</i>       |                                          |
| DH5 $\alpha$                  | TransGen Biotech (Beijing, China)        |
| BL21 (DE3)                    | TransGen Biotech (Beijing, China)        |
| D1000                         | Biomedal (Sevilla, Spain)                |
| S17-1 $\lambda$ pir           | Biomedal (Sevilla, Spain)                |
| BL21/pETTrxB                  | This study                               |
| Plasmids                      |                                          |
| pEASY®-T1 Simple Cloning Kit  | TransGen Biotech (Beijing, China)        |

**Table S2.** Oligonucleotide primers used in this study

| Primer name | References or sources Sequence (5'-3')              |
|-------------|-----------------------------------------------------|
| TrxBKOF1    | <u>GGATCCC</u> ATCAGATAAGAGCAAAC ( <i>Bam</i> H I)  |
| TrxBKOR1    | TCCATGACCATGCCGGTGATCAGCAC                          |
| TrxBKOF2    | CCGGCATGGTCATGGACCATATCTATCGT                       |
| TrxBKOR2    | <u>GGATCCG</u> ACTGCGCTGTTTCAGC ( <i>Bam</i> H I)   |
| TrxBKOF3    | TCGAGTCCAAGACGTACCAC                                |
| TrxBKOR3    | ATATTACAACGCTGCTCAAGG                               |
| TrxBF       | <u>GGATCC</u> ATGGTCTATGCGGCGCGT ( <i>Bam</i> H I)  |
| TrxBR       | <u>AAGCTT</u> GTGGCGAGCGGCATC ( <i>Hind</i> III)    |
| TrxAkof1    | <u>GGATCCC</u> GATCAGGATATCGACACC ( <i>Bam</i> H I) |
| TrxAkor1    | AGCAGCAGTTCAGCCTTCAGCACGTC                          |
| TrxAkof2    | AGGCTGAACTGCTGCTGTTCAAGAAC                          |
| TrxAkor2    | <u>GGATCC</u> ATCCTGCAGGATCTCCAG ( <i>Bam</i> H I)  |
| TrxAkof3    | GTCGGCAAACCTTCTGTTTCAGTC                            |
